# Supplementary material for: Beyond Design Codes: An Integrated Analysis of Farmer-Built Dam Performance Using Geotechnical and Hydrological Methods
Source: Research Square preprint supplement (doi:10.21203/rs.3.rs-7688005/v1), 2025-10-16
Supplement: Supplementary file 1 [file 253c3d8ba30e47d0008e77ea.docx]

| No. | Dam Name | Latitude | Longitude |
| --- | --- | --- | --- |
| 1 | Hamza | 35.57986 | 44.78268 |
| 2 | Tavan | 35.30972 | 45.37548 |
| 3 | Zhalla | 35.45302 | 45.10837 |
| 4 | Qallachugha | 35.44752 | 44.97087 |
| 5 | Chami Dewana | 35.2887 | 45.38428 |
| 6 | Tazhga | 35.58107 | 44.98198 |
| 7 | Chollmak | 35.53036 | 45.02549 |
| 8 | Kuradawe | 35.4318 | 44.94447 |
| 9 | Alimansur | 35.5089 | 44.90872 |
| 10 | Goran | 35.36724 | 44.85554 |
| 11 | Kallan | 35.25878 | 45.12106 |
| 12 | Lakawa | 35.57366 | 44.93386 |
| 13 | Qaraman | 35.38724 | 45.40487 |
| 14 | Zarda | 35.22033 | 44.78469 |

Table 1 Latitude and Longitude of the Small Dams Used in this Study.
