# Supplementary material for: Beyond Design Codes: An Integrated Analysis of Farmer-Built Dam Performance Using Geotechnical and Hydrological Methods
Source: Research Square preprint supplement (doi:10.21203/rs.3.rs-7688005/v1), 2025-10-16
Supplement: Supplementary file 3 [file 2d6bffce253175807a2dba06.docx]

Table 7: Correlation Between Dam Dimensions and Construction Cost.

| Dams' Dimensions | Correlation with Estimated Construction Cost |
| --- | --- |
| Height of the dam (m) | 0.25 |
| Length of the Dam Crest (m) | 0.51 |
| Width of the crest | 0.38 |
| Reservoir Surface Area m2 | 0.45 |
