# Supplementary material for: Beyond Design Codes: An Integrated Analysis of Farmer-Built Dam Performance Using Geotechnical and Hydrological Methods
Source: Research Square preprint supplement (doi:10.21203/rs.3.rs-7688005/v1), 2025-10-16
Supplement: Supplementary file 4 [file 2e32bb2d1a62220372a5901c.docx]

Table 2 Reservoir Surface Area, Dam Body Dimensions, and Slopes.

| No. | Dam Name | Reservoir Surface Area m2 | Dam Height (m) | Crest Length (m) | Crest Width (m) | Upstream Slope | Downstream Slope |
| --- | --- | --- | --- | --- | --- | --- | --- |
| 1 | Hamza | 45,600 | 11.15 | 119 | 7 | 1.85 | 1.57 |
| 2 | Tavan | 22,000 | 11.9 | 82 | 3 | 1.87 | 1.8 |
| 3 | Zhalla | 17,690 | 11 | 50 | 3 | 1.54 | 1.38 |
| 4 | Qallachugha | 15,250 | 8 | 50 | 3.5 | 1.67 | 1.58 |
| 5 | Chami Dewana | 14,400 | 7 | 82 | 3 | 1.48 | 1.69 |
| 6 | Tazhga | 8,600 | 14.6 | 59 | 4 | 1.44 | 1.45 |
| 7 | Chollmak | 7,232 | 10 | 120 | 4 | 1.92 | 1.74 |
| 8 | Kuradawe | 6,800 | 11.5 | 125 | 4 | 1.63 | 1.59 |
| 9 | Alimansur | 5,540 | 11 | 115 | 3 | 1.45 | 1.63 |
| 10 | Goran | 5,280 | 15 | 75 | 3.5 | 1.59 | 1.66 |
| 11 | Kallan | 5,100 | 15 | 55 | 6 | 1.88 | 1.79 |
| 12 | Lakawa | 5,000 | 13 | 80 | 7 | 1.79 | 1.93 |
| 13 | Qaraman | 4,150 | 10.5 | 56 | 3.5 | 2.03 | 1.52 |
| 14 | Zarda | 1,500 | 7 | 32 | 4 | 1.67 | 1.65 |
