# Supplementary material for: Beyond Design Codes: An Integrated Analysis of Farmer-Built Dam Performance Using Geotechnical and Hydrological Methods
Source: Research Square preprint supplement (doi:10.21203/rs.3.rs-7688005/v1), 2025-10-16
Supplement: Supplementary file 5 [file 3cf4a7e6aa158a5b68da6d83.docx]

Table 6 The Cost of Some Government-built Dams in the Sulaymaniyah Governorate.

| No. | Name | Watershed Area Km2 | Dam Height m | Dam Length m | Total Cost $US |
| --- | --- | --- | --- | --- | --- |
| 1 | HamzaRomi | 4.4 | 14 | 118 | 422,730 |
| 2 | Sarchnar | 5.4 | 18 | 171 | 412,381 |
| 3 | NwreySerw | 18.9 | 15 | 112 | 455,388 |
| 4 | Taqtaq | 1.2 | 15 | 115 | 363,710 |
| 5 | Zarda | 8.7 | 14 | 100 | 335,477 |
| 6 | Balakjar | 0.4 | 13 | 83 | 237,391 |
| Average | | 6.5 | 15 | 117 | 371,180 |
| Maximum | | 18.9 | 18 | 171 | 455,388 |
| Minimum | | 0.4 | 13 | 83 | 237,391 |
| SD | | 6.8 | 2 | 30 | 78,327 |
