# Supplementary material for: Beyond Design Codes: An Integrated Analysis of Farmer-Built Dam Performance Using Geotechnical and Hydrological Methods
Source: Research Square preprint supplement (doi:10.21203/rs.3.rs-7688005/v1), 2025-10-16
Supplement: Supplementary file 6 [file 3e653a62a42d4c7e84366f42.docx]

Table 4 Dams Year of Construction and Current Condition.

| No. | Dam names | Year of construction | Dam State | Spillway State |
| --- | --- | --- | --- | --- |
| 1 | Hamza | 2018 | Poor | Fair |
| 2 | Tavan | 2012 | Good | Good |
| 3 | Zhalla | 2013 | Good | Poor |
| 4 | Qallachugha | 2020 | Good | Good |
| 5 | Chami Dewana | 2015 | Good | Good |
| 6 | Tazhga | 2020 | Good | Good |
| 7 | Chollmak | 2014 | Good | Good |
| 8 | Kuradawe | 2012 | Good | Fair |
| 9 | Alimansur | 2019 | Good | Good |
| 10 | Goran | 2019 | Poor | Fair |
| 11 | Kallan | 2021 | Good | Good |
| 12 | Lakawa | 2016 | Good | Good |
| 13 | Qaraman | 2020 | Good | Fair |
| 14 | Zarda | 2017 | Unsafe | Fair |
