# Supplementary material for: Beyond Design Codes: An Integrated Analysis of Farmer-Built Dam Performance Using Geotechnical and Hydrological Methods
Source: Research Square preprint supplement (doi:10.21203/rs.3.rs-7688005/v1), 2025-10-16
Supplement: Supplementary file 7 [file 798461be9264b9f6d4056016.docx]

Table 11 Rainfall Depths (50-year T) for Chamchamal and Qaradagh Stations.

| T | 50 |
| --- | --- |
| Kt | 2.6 |
| Chamchamal Station Rain mm | 117 |
| Qaradagh Station Rain mm | 170 |
