# Supplementary material for: Beyond Design Codes: An Integrated Analysis of Farmer-Built Dam Performance Using Geotechnical and Hydrological Methods
Source: Research Square preprint supplement (doi:10.21203/rs.3.rs-7688005/v1), 2025-10-16
Supplement: Supplementary file 8 [file 8327f78de9500cf32353610f.docx]

Table 10 The Upstream and Downstream Factors of Safety Using GeoStudio 2024.2.1.

| No. | Dam Name | Upstream | Downstream |
| --- | --- | --- | --- |
| 1 | Hamza | 1.576 | 2.060 |
| 2 | Tavan | 0.512 | 0.964 |
| 3 | Zhalla | 0.978 | 1.724 |
| 4 | Qallachugha | 1.555 | 1.923 |
| 5 | Chami Dewana | 0.886 | 1.351 |
| 6 | Tazhga | 0.622 | 1.115 |
| 7 | Chollmak | 2.382 | 2.700 |
| 8 | Kuradawe | 0.728 | 0.990 |
| 9 | Alimansur | 0.479 | 1.011 |
| 10 | Goran | 1.306 | 1.616 |
| 11 | Kallan | 0.452 | 0.836 |
| 12 | Lakawa | 1.350 | 2.247 |
| 13 | Qaraman | 2.203 | 2.165 |
| 14 | Zarda | 0.460 | 1.351 |
