# Supplementary material for: Beyond Design Codes: An Integrated Analysis of Farmer-Built Dam Performance Using Geotechnical and Hydrological Methods
Source: Research Square preprint supplement (doi:10.21203/rs.3.rs-7688005/v1), 2025-10-16
Supplement: Supplementary file 9 [file 9bb978f34ded308a3df8adf9.docx]

Table 12 Watershed Area and CN for the Dams.

| Dam No. | Dam Name | Watershed Area (km²) | CN |
| --- | --- | --- | --- |
| 1 | Hamza | 5.35 | 64 |
| 2 | Zhalla | 3.02 | 56 |
| 3 | Tazhga | 2.9 | 57 |
| 4 | Lakawa | 2.75 | 56 |
| 5 | Kuradawe | 1.75 | 61 |
| 6 | Chami Dewana | 1.48 | 75 |
| 7 | Kallan | 1.15 | 57 |
| 8 | Chollmak | 0.7 | 59 |
| 9 | Goran | 0.53 | 60 |
| 10 | Tavan | 0.51 | 79 |
| 11 | Qaraman | 0.42 | 83 |
| 12 | Qallachugha | 0.37 | 57 |
| 13 | Kunakotr | 0.27 | 56 |
| 14 | Alimansur | 0.24 | 62 |
