# Supplementary material for: Beyond Design Codes: An Integrated Analysis of Farmer-Built Dam Performance Using Geotechnical and Hydrological Methods
Source: Research Square preprint supplement (doi:10.21203/rs.3.rs-7688005/v1), 2025-10-16
Supplement: Supplementary file 10 [file a2dbf8b18d49e0c3d9b48f02.docx]

Table 13 Actual Spillway Capacity and Estimated 50-year Peak Flow.

| Dam No. | Dam Name | Spillway Capacity (m³/s) | Peak flow (m³/s) for 50-year Return Periods |
| --- | --- | --- | --- |
| 1 | Hamza | 12.29 | 11.53 |
| 2 | Tavan | 7.81 | 6.97 |
| 3 | Zhalla | 8.65 | 4.04 |
| 4 | Qallachugha | 11.06 | 3.36 |
| 5 | Chami Dewana | 3.31 | 11.98 |
| 6 | Tazhga | 27.20 | 4.97 |
| 7 | Chollmak | 54.77 | 1.46 |
| 8 | Kuradawe | 6.25 | 0.7 |
| 9 | Alimansur | 3.40 | 0.83 |
| 10 | Goran | 54.40 | 1.73 |
| 11 | Kallan | 14.42 | 2.49 |
| 12 | Lakawa | 89.05 | 3.66 |
| 13 | Qaraman | 5.65 | 7.18 |
| 14 | Zarda | 28.27 | 0.95 |
