# Supplementary material for: Beyond Design Codes: An Integrated Analysis of Farmer-Built Dam Performance Using Geotechnical and Hydrological Methods
Source: Research Square preprint supplement (doi:10.21203/rs.3.rs-7688005/v1), 2025-10-16
Supplement: Supplementary file 11 [file a9d13a159b740400380dd80a.docx]

Table 5 Estimated Cost of the Dams.

| No. | Small dam names | Estimated Construction Cost $ US |
| --- | --- | --- |
| 1 | Hamza | 40,000 |
| 2 | Tavan | 4,000 |
| 3 | Zhalla | 23,333 |
| 4 | Qallachugha | 20,000 |
| 5 | Chami Dewana | 10,000 |
| 6 | Tazhga | 20,000 |
| 7 | Chollmak | 9,333 |
| 8 | Kuradawe | 40,000 |
| 9 | Alimansur | 20,667 |
| 10 | Goran | 20,000 |
| 11 | Kallan | 14,667 |
| 12 | Lakawa | 18,667 |
| 13 | Qaraman | 2,667 |
| 14 | Zarda | 4,667 |
| Average | | 17,714 |
| Maximum | | 40,000 |
| Minimum | | 2,667 |
