# Supplementary material for: Beyond Design Codes: An Integrated Analysis of Farmer-Built Dam Performance Using Geotechnical and Hydrological Methods
Source: Research Square preprint supplement (doi:10.21203/rs.3.rs-7688005/v1), 2025-10-16
Supplement: Supplementary file 12 [file ae62dea4d3d2da831ee65fc3.docx]

Table 3 Comparison Between the Dam Crest Widths and the Required Standard Dam Crest Width.

| No. | Dam Name | Crest Width (m) | Standard Crest Width (m) |
| --- | --- | --- | --- |
| 1 | Hamza | 7 | 5 |
| 2 | Tavan | 3 | 5 |
| 3 | Zhalla | 3 | 5 |
| 4 | Qallachugha | 3.5 | 5 |
| 5 | Chami Dewana | 3 | 4 |
| 6 | Tazhga | 4 | 6 |
| 7 | Chollmak | 4 | 5 |
| 8 | Kuradawe | 4 | 5 |
| 9 | Alimansur | 3 | 5 |
| 10 | Goran | 3.5 | 6 |
| 11 | Kallan | 6 | 6 |
| 12 | Lakawa | 7 | 6 |
| 13 | Qaraman | 3.5 | 5 |
| 14 | Zarda | 4 | 4 |
