# Supplementary material for: Beyond Design Codes: An Integrated Analysis of Farmer-Built Dam Performance Using Geotechnical and Hydrological Methods
Source: Research Square preprint supplement (doi:10.21203/rs.3.rs-7688005/v1), 2025-10-16
Supplement: Supplementary file 13 [file bcbb86813dd820241272d80a.docx]

Table 9 Soil Sample Test Results Second Part.

| Dam No. | Dam Name | Permeability Kav (m/sec) *106 | Specific Gravity (GS) | Liquid Limit % | Plastic Limit % | Plasticity Index | Soil Classification USCS | Group Name ASTM | Void ratio (e). | Porosity (n) | (W) |
| --- | --- | --- | --- | --- | --- | --- | --- | --- | --- | --- | --- |
|  |
| 1 | Hamza | 0.059 | 2.714 | 32.97 | 21.23 | 11.74 | CL | Sandy Lean Clay | 0.767 | 0.434 | 0.282 |  |
| 2 | Tavan | 0.059 | 2.714 | 30.86 | 20.87 | 9.99 | CL | Sandy Lean Clay | 0.736 | 0.424 | 0.271 |  |
| 3 | Zhalla | 0.059 | 2.714 | 27.54 | 17.83 | 9.71 | SC | Clayey Sand | 0.718 | 0.418 | 0.265 |  |
| 4 | Qallachugha | 0.040 | 2.753 | 25.24 | 17.43 | 7.81 | SC | Clayey Sand with Gravel | 0.601 | 0.375 | 0.218 |  |
| 5 | Chami Dewana | 0.040 | 2.753 | 33.49 | 19.88 | 13.61 | CL | Sandy Lean Clay | 0.499 | 0.333 | 0.181 |  |
| 6 | Tazhga | 0.059 | 2.714 | 29.1 | 18.24 | 10.86 | CL | Sandy Lean Clay | 0.742 | 0.426 | 0.273 |  |
| 7 | Chollmak | 0.040 | 2.753 | 26.87 | 17.7 | 9.17 | SC | Clayey Sand | 0.616 | 0.381 | 0.224 |  |
| 8 | Kuradawe | 0.040 | 2.753 | 24.4 | 16.76 | 7.64 | SC | Clayey Sand with Gravel | 0.501 | 0.334 | 0.182 |  |
| 9 | Alimansur | 0.059 | 2.714 | 31.06 | 19.97 | 11.09 | CL | Sandy Lean Clay | 0.775 | 0.437 | 0.285 |  |
| 10 | Goran | 0.148 | 2.715 | 31.37 | 23.78 | 7.59 | CL | Sandy Lean Clay with Gravel | 0.911 | 0.477 | 0.335 |  |
| 11 | Kallan | 0.148 | 2.715 | 33.96 | 21.81 | 12.15 | CL | Sandy Lean Clay with Gravel | 1.021 | 0.505 | 0.376 |  |
| 12 | Lakawa | 0.040 | 2.753 | 24.3 | 16.58 | 7.72 | SC | Clayey Sand with Gravel | 0.582 | 0.368 | 0.211 |  |
| 13 | Qaraman | 0.059 | 2.714 | 31.61 | 22.44 | 9.17 | CL | Sandy Lean Clay | 0.760 | 0.432 | 0.280 |  |
| 14 | Zarda | 0.059 | 2.714 | 28.66 | 20.27 | 8.39 | CL | Sandy Lean Clay with Gravel | 0.802 | 0.445 | 0.295 |  |
