# Supplementary material for: Beyond Design Codes: An Integrated Analysis of Farmer-Built Dam Performance Using Geotechnical and Hydrological Methods
Source: Research Square preprint supplement (doi:10.21203/rs.3.rs-7688005/v1), 2025-10-16
Supplement: Supplementary file 14 [file feb14bc756d4cd310a0a8f67.docx]

Table 8: Soil Samples Test Results First Part.

| Dam No. | Dam Names | Sieve Analysis | | | Wet Density g/cm³ | W.C % | Cohesion C (KPa) | Angle of Internal Friction Ø in degrees | Dry Density g/cm³ | Compressibility Mv kPa⁻¹ |
| --- | --- | --- | --- | --- | --- | --- | --- | --- | --- | --- |
| Gravel % | Sand % | Fines (Silt + Clay) % |
| 1 | Hamza | 12.55 | 29.85 | 57.6 | 1.69 | 10.00 | 34.46 | 29.98 | 1.54 | 0.88 |
| 2 | Tavan | 13.42 | 34.08 | 52.5 | 1.73 | 10.63 | 10.66 | 28.83 | 1.56 | 0.88 |
| 3 | Zhalla | 10.09 | 43.78 | 46.13 | 1.73 | 9.54 | 24.99 | 26.57 | 1.58 | 0.88 |
| 4 | Qallachugha | 18.38 | 33.51 | 48.11 | 1.84 | 7.02 | 31.96 | 30.38 | 1.72 | 0.85 |
| 5 | Chami Dewana | 12.62 | 31.73 | 55.65 | 2.04 | 11.10 | 17.76 | 29.18 | 1.84 | 0.85 |
| 6 | Tazhga | 9.49 | 25.91 | 64.6 | 1.73 | 11.04 | 14.33 | 25.03 | 1.56 | 0.88 |
| 7 | Chollmak | 13.95 | 42.78 | 43.27 | 1.84 | 8.02 | 40.33 | 22.95 | 1.70 | 0.85 |
| 8 | Kuradawe | 24.18 | 29.71 | 46.11 | 1.93 | 5.23 | 38.81 | 21.35 | 1.83 | 0.85 |
| 9 | Alimansur | 12.33 | 24.51 | 63.16 | 1.75 | 14.43 | 9.89 | 24.29 | 1.53 | 0.88 |
| 10 | Goran | 17.25 | 31.74 | 51.01 | 1.66 | 16.83 | 34.028 | 12.88 | 1.42 | 1.00 |
| 11 | Kallan | 15.13 | 31.89 | 52.98 | 1.55 | 15.40 | 9.25 | 18.56 | 1.34 | 1.00 |
| 12 | Lakawa | 15.42 | 36.43 | 48.15 | 1.88 | 8.05 | 23.85 | 33.88 | 1.74 | 0.85 |
| 13 | Qaraman | 5.22 | 30.39 | 64.39 | 1.78 | 15.40 | 39.96 | 13.35 | 1.54 | 0.88 |
| 14 | Zarda | 19.47 | 30.36 | 50.17 | 1.65 | 9.54 | 7.67 | 24.19 | 1.51 | 0.88 |
